# Supplementary material for: Identification of a Novel Aminopeptidase P-Like Gene (OnAPP) Possibly Involved in Bt Toxicity and Resistance in a Major Corn Pest (Ostrinia nubilalis)
Source: PubMed Central journal article supplement (PMC3161092; doi:10.1371/journal.pone.0023983), 2011-08-24

Figure S1

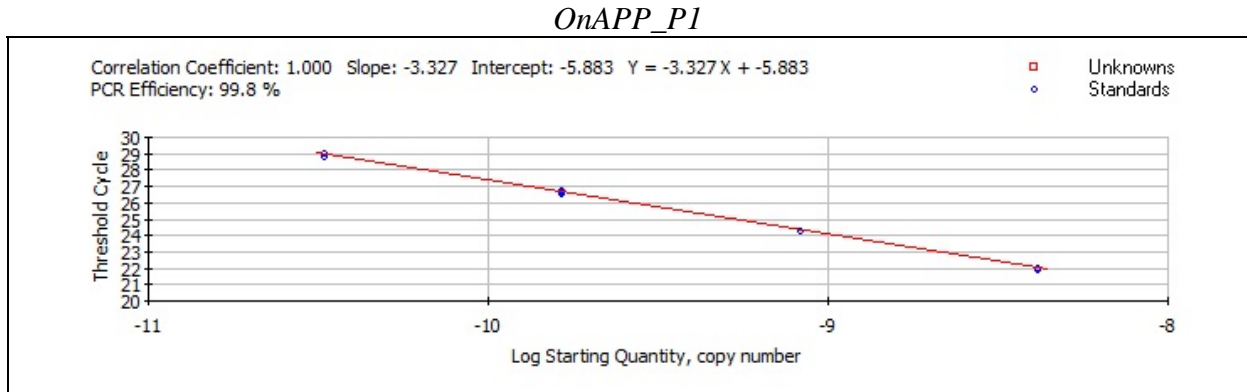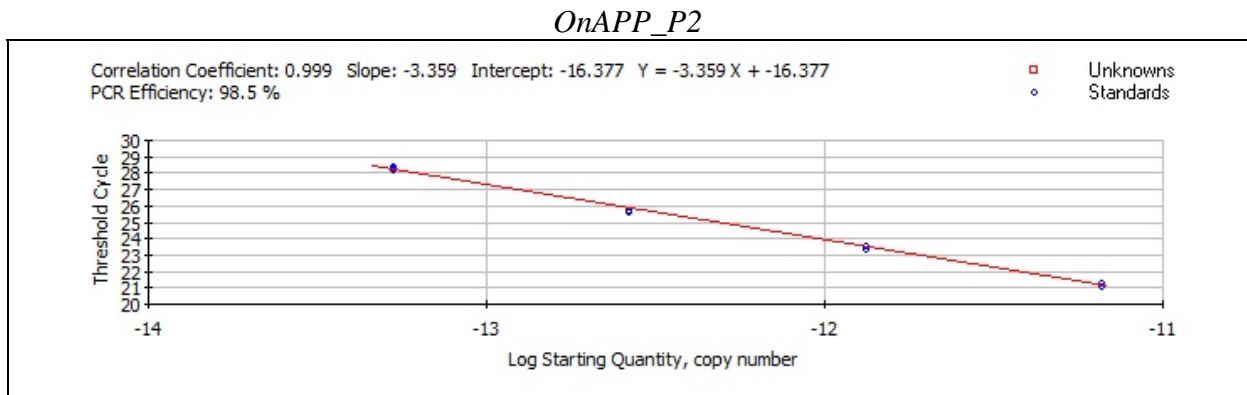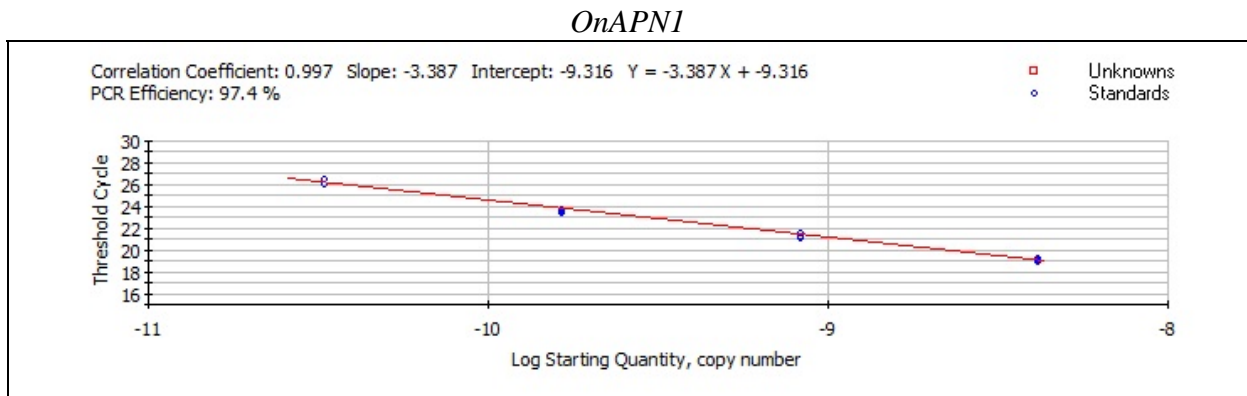

*OnAPN2*

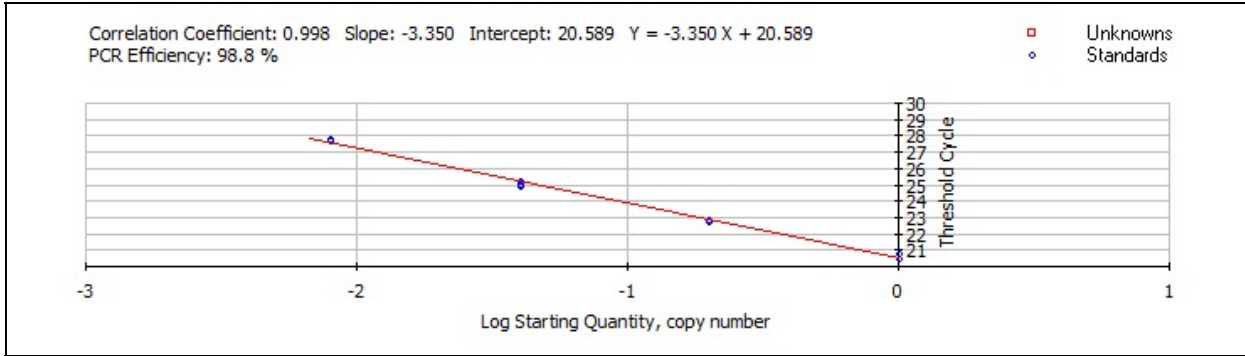

*OnAPN3*

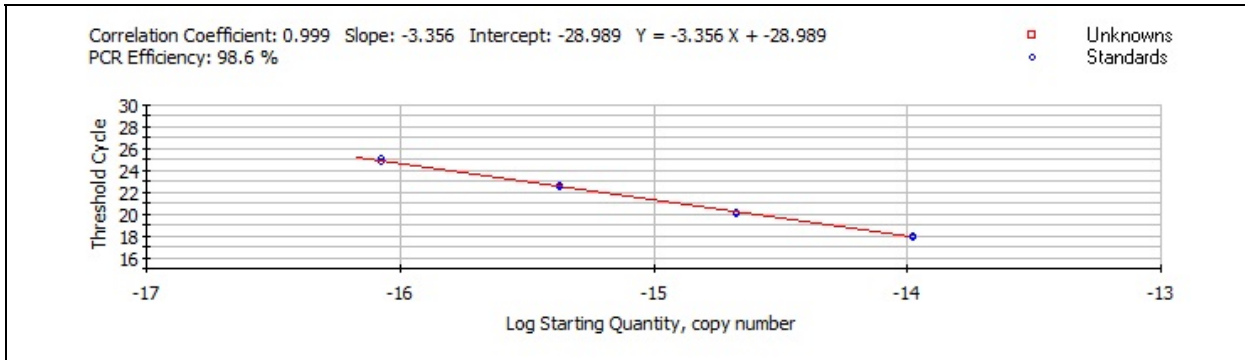

*OnAPN4*

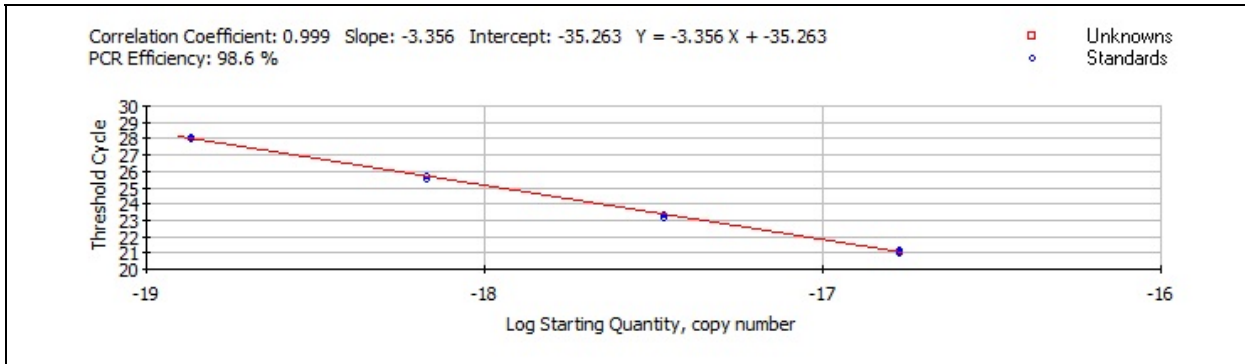

*OnAPN5*

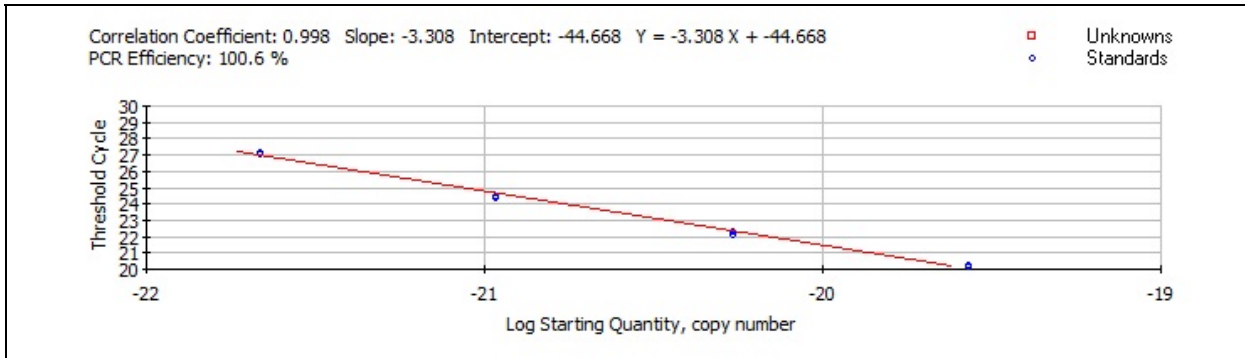

### OnAPN6

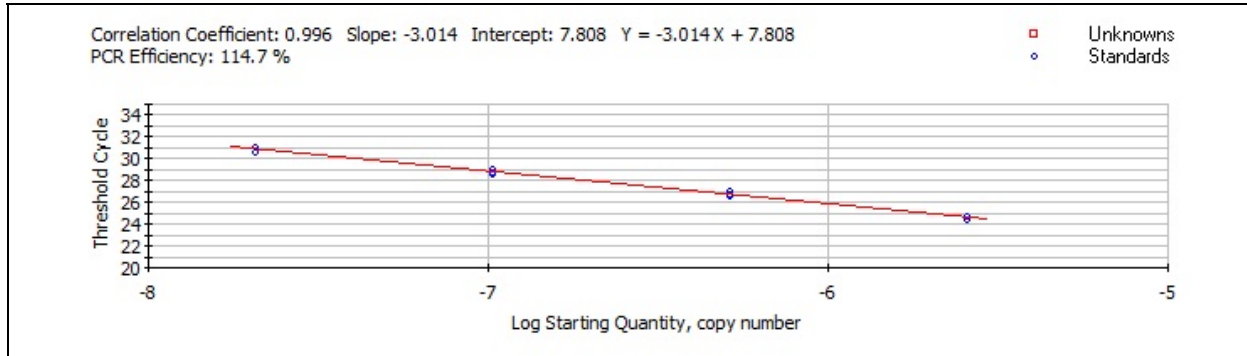

### OnAPN7

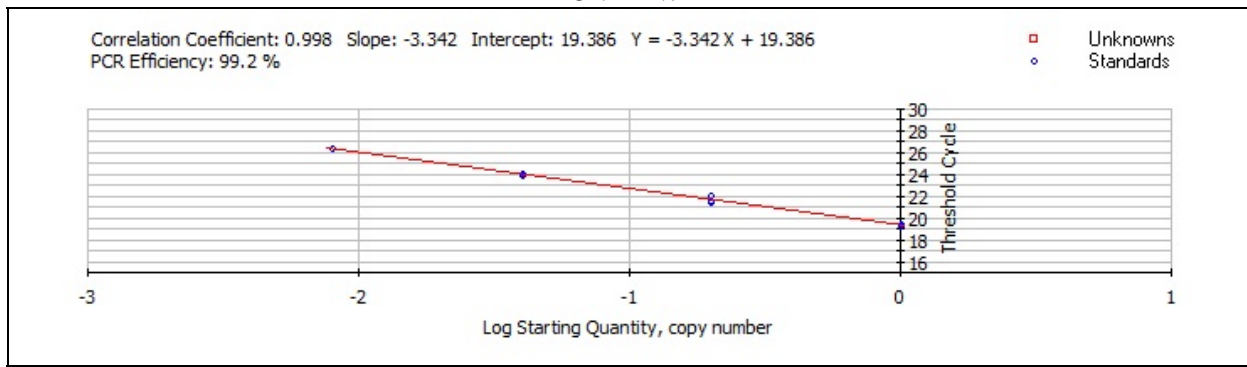

### OnANP8

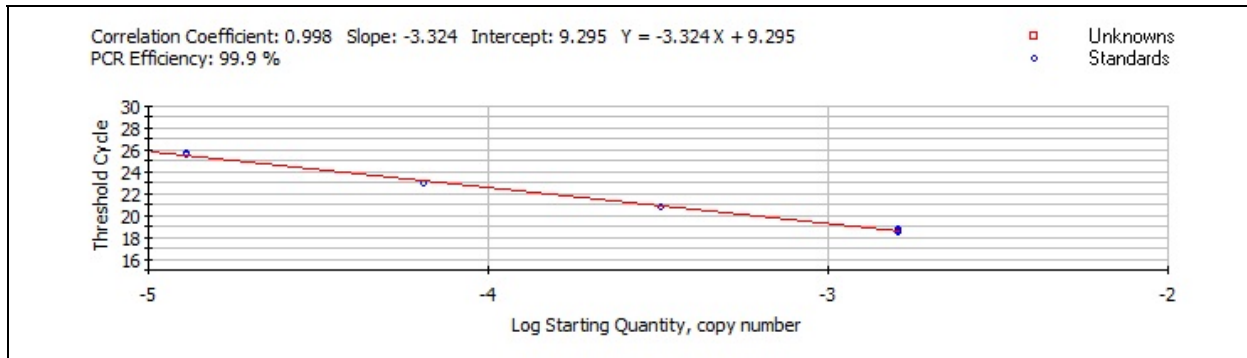

### OnAPN9

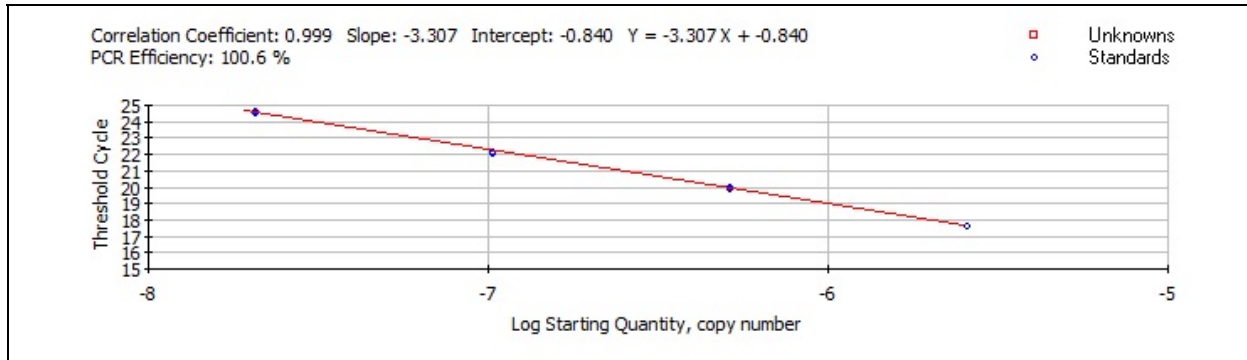

### RPS3

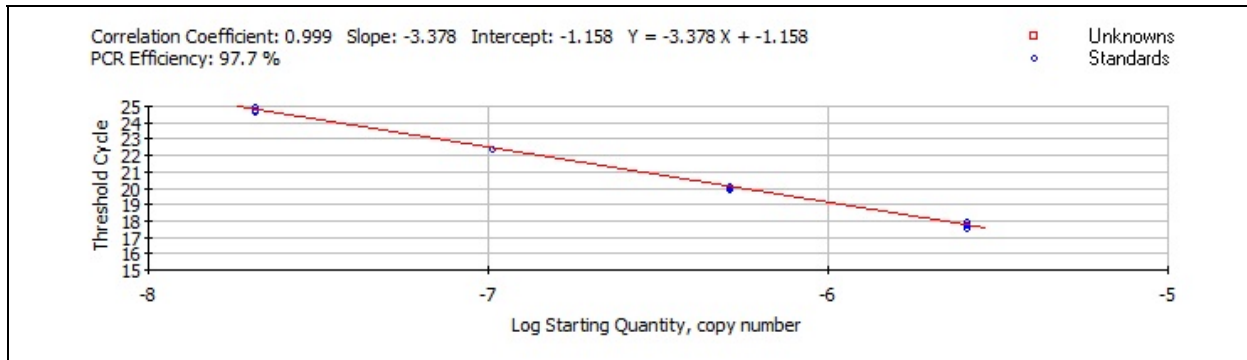

Supplement: pone.0023983.s001.pdf [file pone.0023983.s001.pdf]
